# Supplementary material
Source: Springer Nature journal article supplement (https://www.springermedizin.de/resource/supplementary/12889_2011_3264_MOESM3_ESM.pdf/9488616)

**Lung and Bronchus Cancer**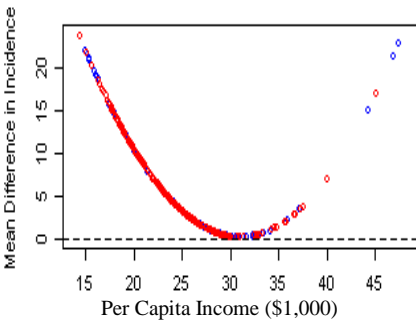**All Types of Cancer**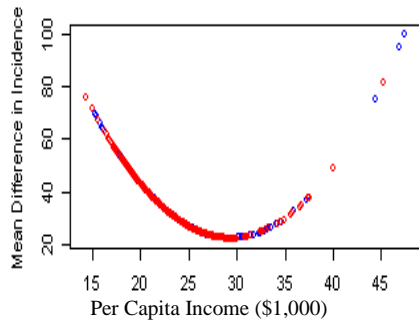**CVD**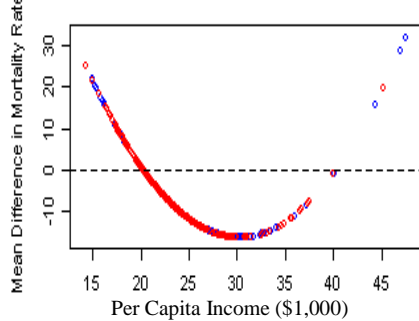**Heart Disease**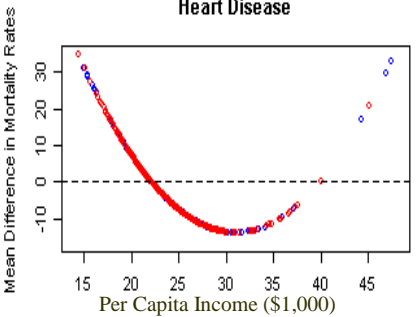**YPLL75**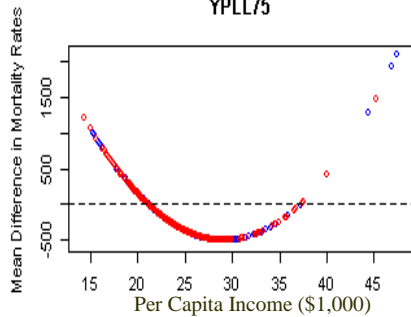**Population**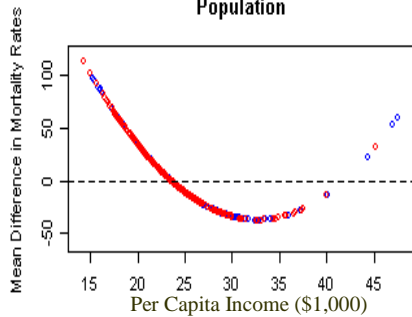

Supplement: MOESM3 [file 9488616]
